# Supplementary material
Source: publisher figshare collection journal article supplement (https://acs.figshare.com/ndownloader/files/5187943)
Supplement: Supplementary file 1 [file 5187943]

#ja036999i 

data_02063 
 
_audit_creation_method            SHELXL-97 
_chemical_name_systematic 
; 
 ? 
; 
_chemical_name_common             ? 
_chemical_melting_point           ? 
_chemical_formula_moiety          
 'C30 H56 N3 P2 Re Si2'
_chemical_formula_sum 
 'C30 H56 N3 P2 Re Si2' 
_chemical_formula_weight          763.10 
 
loop_ 
 _atom_type_symbol 
 _atom_type_description 
 _atom_type_scat_dispersion_real 
 _atom_type_scat_dispersion_imag 
 _atom_type_scat_source 
 'C'  'C'   0.0033   0.0016 
 'International Tables Vol C Tables 4.2.6.8 and 6.1.1.4' 
 'H'  'H'   0.0000   0.0000 
 'International Tables Vol C Tables 4.2.6.8 and 6.1.1.4' 
 'N'  'N'   0.0061   0.0033 
 'International Tables Vol C Tables 4.2.6.8 and 6.1.1.4' 
 'Si'  'Si'   0.0817   0.0704 
 'International Tables Vol C Tables 4.2.6.8 and 6.1.1.4' 
 'P'  'P'   0.1023   0.0942 
 'International Tables Vol C Tables 4.2.6.8 and 6.1.1.4' 
 'Re'  'Re'  -1.0185   7.2310 
 'International Tables Vol C Tables 4.2.6.8 and 6.1.1.4' 
 
_symmetry_cell_setting            monoclinic
_symmetry_space_group_name_H-M    P2/c 
 
loop_ 
 _symmetry_equiv_pos_as_xyz 
 'x, y, z' 
 '-x, y, -z+1/2' 
 '-x, -y, -z' 
 'x, -y, z-1/2' 
 
_cell_length_a                    19.3458(8) 
_cell_length_b                    10.7479(4) 
_cell_length_c                    18.3294(7) 
_cell_angle_alpha                 90.00 
_cell_angle_beta                  113.7140(10) 
_cell_angle_gamma                 90.00 
_cell_volume                      3489.4(2) 
_cell_formula_units_Z             4 
_cell_measurement_temperature     120(2) 
_cell_measurement_reflns_used     8581 
_cell_measurement_theta_min       2.3
_cell_measurement_theta_max       32.5
 
_exptl_crystal_description        plate 
_exptl_crystal_colour             red
_exptl_crystal_size_max           0.20 
_exptl_crystal_size_mid           0.20 
_exptl_crystal_size_min           0.08 
_exptl_crystal_density_meas       ? 
_exptl_crystal_density_diffrn     1.453 
_exptl_crystal_density_method     'not measured' 
_exptl_crystal_F_000              1560 
_exptl_absorpt_coefficient_mu     3.666 
_exptl_absorpt_correction_type    'multi-scans' 
_exptl_absorpt_correction_T_min   0.5276 
_exptl_absorpt_correction_T_max   0.7580 
_exptl_absorpt_process_details    'SADBAS, R. Blessing (1995)'
 
_exptl_special_details 
; 
 ? 
; 
 
_diffrn_ambient_temperature       120(2) 
_diffrn_radiation_wavelength      0.71073 
_diffrn_radiation_type            MoK\a 
_diffrn_radiation_source          'fine-focus sealed tube' 
_diffrn_radiation_monochromator   graphite 
_diffrn_measurement_details
 '0.30 degree frames measured for 15 seconds each' 
_diffrn_measurement_method        \w-scans 
_diffrn_measurement_device        'three-circle goniometer with fixed chi' 
_diffrn_measurement_device_type   'Bruker Platform goniometer' 
_diffrn_detector                  'CCD area detector' 
_diffrn_detector_type             'Bruker SMART 6000' 
_diffrn_detector_area_resol_mean  44.52
_diffrn_standards_number          704 
_diffrn_standards_interval_count  ? 
_diffrn_standards_interval_time   757
_diffrn_standards_decay_%         0.0
_diffrn_reflns_number             19687 
_diffrn_reflns_av_R_equivalents   0.0259 
_diffrn_reflns_av_sigmaI/netI     0.0393 
_diffrn_reflns_limit_h_min        -27 
_diffrn_reflns_limit_h_max        26 
_diffrn_reflns_limit_k_min        -15 
_diffrn_reflns_limit_k_max        5 
_diffrn_reflns_limit_l_min        -24 
_diffrn_reflns_limit_l_max        24 
_diffrn_reflns_theta_min          2.22 
_diffrn_reflns_theta_max          30.02 
_reflns_number_total              9885 
_reflns_number_gt                 8280 
_reflns_threshold_expression      >2sigma(I) 
 
_computing_data_collection        'SMART (Bruker, 1999)' 
_computing_cell_refinement        'SAINT (Bruker, 1999)' 
_computing_data_reduction         'SAINT (Bruker, 1999)' 
_computing_structure_solution     'SIR-92 (Alatomare et al., 1993)' 
_computing_structure_refinement   'SHELXL-97 (Sheldrick, 1997)' 
_computing_molecular_graphics     'XTEL (local library)'
_computing_publication_material   'XCIF (Bruker, 1999), XTEL (local library)'
 
_refine_special_details 
; 
 Refinement of F^2^ against ALL reflections.  The weighted R-factor wR and 
 goodness of fit S are based on F^2^, conventional R-factors R are based 
 on F, with F set to zero for negative F^2^. The threshold expression of 
 F^2^ > 2sigma(F^2^) is used only for calculating R-factors(gt) etc. and is 
 not relevant to the choice of reflections for refinement.  R-factors based 
 on F^2^ are statistically about twice as large as those based on F, and R- 
 factors based on ALL data will be even larger. 
; 
 
_refine_ls_structure_factor_coef  Fsqd  
_refine_ls_matrix_type            full 
_refine_ls_weighting_scheme       calc  
_refine_ls_weighting_details 
 'calc w=1/[\s^2^(Fo^2^)+(0.0278P)^2^+0.4796P] where P=(Fo^2^+2Fc^2^)/3' 
_atom_sites_solution_primary      direct 
_atom_sites_solution_secondary    difmap 
_atom_sites_solution_hydrogens    geom 
_refine_ls_hydrogen_treatment     riding 
_refine_ls_extinction_method      none 
_refine_ls_extinction_coef        ? 
_refine_ls_number_reflns          9885 
_refine_ls_number_parameters      452 
_refine_ls_number_restraints      19 
_refine_ls_R_factor_all           0.0360 
_refine_ls_R_factor_gt            0.0266 
_refine_ls_wR_factor_ref          0.0622 
_refine_ls_wR_factor_gt           0.0588 
_refine_ls_goodness_of_fit_ref    1.025 
_refine_ls_restrained_S_all       1.025 
_refine_ls_shift/su_max           0.005 
_refine_ls_shift/su_mean          0.000 
 
loop_ 
 _atom_site_label 
 _atom_site_type_symbol 
 _atom_site_fract_x 
 _atom_site_fract_y 
 _atom_site_fract_z 
 _atom_site_U_iso_or_equiv 
 _atom_site_adp_type 
 _atom_site_occupancy 
 _atom_site_symmetry_multiplicity 
 _atom_site_calc_flag 
 _atom_site_refinement_flags 
 _atom_site_disorder_assembly 
 _atom_site_disorder_group 
Re1A Re 0.0000 0.179907(11) 0.2500 0.01705(4) Uani 1 2 d S . . 
P1A P -0.07391(4) 0.19665(6) 0.10992(4) 0.02119(14) Uani 1 1 d . . . 
Si1A Si -0.07411(5) 0.45565(7) 0.17887(5) 0.02868(17) Uani 1 1 d . . . 
N1A N 0.0000 0.3796(3) 0.2500 0.0212(6) Uani 1 2 d S . . 
N2A N 0.10194(14) 0.1599(2) 0.23247(13) 0.0252(5) Uani 1 1 d . . . 
C1A C -0.0476(3) 0.6001(3) 0.1375(2) 0.0437(9) Uani 1 1 d . A . 
H1AB H -0.0092 0.5792 0.1173 0.083(17) Uiso 1 1 calc R . . 
H1AC H -0.0274 0.6626 0.1797 0.053(12) Uiso 1 1 calc R . . 
H1AD H -0.0924 0.6334 0.0939 0.053(12) Uiso 1 1 calc R . . 
C2A C -0.1465(2) 0.5085(3) 0.2164(2) 0.0497(10) Uani 1 1 d . A . 
H2AA H -0.1689 0.4358 0.2307 0.073(14) Uiso 1 1 calc R . . 
H2AB H -0.1860 0.5558 0.1745 0.057(12) Uiso 1 1 calc R . . 
H2AC H -0.1222 0.5614 0.2633 0.098(18) Uiso 1 1 calc R . . 
C3A C -0.12397(19) 0.3450(3) 0.0936(2) 0.0360(7) Uani 1 1 d . A . 
H3AA H -0.1762 0.3307 0.0888 0.052(12) Uiso 1 1 calc R . . 
H3AB H -0.1267 0.3825 0.0432 0.034(9) Uiso 1 1 calc R . . 
C4A C -0.01841(18) 0.2028(3) 0.04771(16) 0.0291(6) Uani 1 1 d . A . 
H4AA H 0.0175 0.1310 0.0638 0.054(11) Uiso 1 1 calc R . . 
C5A C -0.0642(2) 0.1932(3) -0.04277(19) 0.0449(9) Uani 1 1 d . . . 
H5AA H -0.0305 0.2053 -0.0703 0.045(11) Uiso 1 1 calc R A . 
H5AB H -0.1035 0.2573 -0.0598 0.037(10) Uiso 1 1 calc R . . 
H5AC H -0.0877 0.1108 -0.0558 0.028(8) Uiso 1 1 calc R . . 
C6A C 0.0290(2) 0.3221(3) 0.06643(19) 0.0350(7) Uani 1 1 d . . . 
H6AA H 0.0697 0.3133 0.0478 0.044(11) Uiso 1 1 calc R A . 
H6AB H 0.0508 0.3365 0.1241 0.033(9) Uiso 1 1 calc R . . 
H6AC H -0.0032 0.3926 0.0394 0.042(10) Uiso 1 1 calc R . . 
C7A C -0.1498(4) 0.0778(6) 0.0711(3) 0.0276(13) Uani 0.709(8) 1 d PDU A 1 
H7AA H -0.1711 0.0700 0.1124 0.040(14) Uiso 0.709(8) 1 calc PR A 1 
C8A C -0.1168(7) -0.0508(9) 0.0669(7) 0.034(2) Uani 0.709(8) 1 d PDU A 1 
H8AA H -0.1551 -0.1149 0.0592 0.057(18) Uiso 0.709(8) 1 calc PR A 1 
H8AB H -0.0728 -0.0669 0.1166 0.04(3) Uiso 0.709(8) 1 calc PR A 1 
H8AC H -0.1014 -0.0527 0.0221 0.06(3) Uiso 0.709(8) 1 calc PR A 1 
C9A C -0.2168(3) 0.1101(4) -0.0066(3) 0.0387(13) Uani 0.709(8) 1 d PD A 1 
H9AA H -0.2582 0.0516 -0.0150 0.060(17) Uiso 0.709(8) 1 calc PR A 1 
H9AB H -0.2014 0.1043 -0.0512 0.049(16) Uiso 0.709(8) 1 calc PR A 1 
H9AC H -0.2338 0.1950 -0.0033 0.044(15) Uiso 0.709(8) 1 calc PR A 1 
C7D C -0.1457(8) 0.0815(13) 0.0431(8) 0.024(3) Uani 0.291(8) 1 d PDU A 2 
H7DA H -0.1632 0.1104 -0.0133 0.04(4) Uiso 0.291(8) 1 calc PR A 2 
C8D C -0.1065(18) -0.046(2) 0.051(2) 0.034(6) Uani 0.291(8) 1 d PDU A 2 
H8DA H -0.1444 -0.1093 0.0236 0.03(3) Uiso 0.291(8) 1 calc PR A 2 
H8DB H -0.0804 -0.0673 0.1073 0.01(5) Uiso 0.291(8) 1 calc PR A 2 
H8DC H -0.0698 -0.0410 0.0265 0.04(4) Uiso 0.291(8) 1 calc PR A 2 
C9D C -0.2135(6) 0.0761(12) 0.0658(7) 0.041(3) Uani 0.291(8) 1 d PD A 2 
H9DA H -0.2495 0.0136 0.0329 0.01(2) Uiso 0.291(8) 1 calc PR A 2 
H9DB H -0.2382 0.1577 0.0568 0.02(3) Uiso 0.291(8) 1 calc PR A 2 
H9DC H -0.1965 0.0535 0.1221 0.03(3) Uiso 0.291(8) 1 calc PR A 2 
C10A C 0.06997(17) 0.0501(3) 0.23758(15) 0.0253(6) Uani 1 1 d . A . 
C11A C 0.10639(18) -0.0606(3) 0.23605(17) 0.0292(6) Uani 1 1 d . . . 
H11A H 0.0845 -0.1384 0.2391 0.016(7) Uiso 1 1 calc R A . 
C12A C 0.17673(18) -0.0548(3) 0.22985(17) 0.0317(7) Uani 1 1 d . A . 
C13A C 0.20661(19) 0.0594(3) 0.22322(18) 0.0346(7) Uani 1 1 d . . . 
H13A H 0.2532 0.0642 0.2175 0.048(11) Uiso 1 1 calc R A . 
C14A C 0.16718(18) 0.1679(3) 0.22498(17) 0.0300(6) Uani 1 1 d . A . 
H14A H 0.1871 0.2471 0.2208 0.049(11) Uiso 1 1 calc R . . 
C15A C 0.2208(2) -0.1729(3) 0.2331(2) 0.0430(8) Uani 1 1 d . . . 
H15A H 0.2566 -0.1578 0.2084 0.18(3) Uiso 1 1 calc R A . 
H15B H 0.1859 -0.2394 0.2042 0.092(17) Uiso 1 1 calc R . . 
H15C H 0.2486 -0.1978 0.2887 0.18(3) Uiso 1 1 calc R . . 
Re1B Re 0.5000 0.606068(11) 0.7500 0.01650(4) Uani 1 2 d S . . 
P1B P 0.38663(4) 0.58949(6) 0.63230(4) 0.02131(14) Uani 1 1 d . . . 
Si1B Si 0.45926(5) 0.33139(7) 0.66028(5) 0.02831(17) Uani 1 1 d . . . 
N1B N 0.5000 0.4055(3) 0.7500 0.0215(6) Uani 1 2 d S . . 
N2B N 0.56247(14) 0.6273(2) 0.67750(14) 0.0255(5) Uani 1 1 d . . . 
C1B C 0.4064(2) 0.1846(3) 0.6625(3) 0.0468(9) Uani 1 1 d . . . 
H1BB H 0.4422 0.1219 0.6954 0.063(13) Uiso 1 1 calc R . . 
H1BC H 0.3802 0.1527 0.6082 0.090(17) Uiso 1 1 calc R . . 
H1BD H 0.3695 0.2030 0.6852 0.068(14) Uiso 1 1 calc R . . 
C2B C 0.5306(2) 0.2816(3) 0.6199(2) 0.0431(8) Uani 1 1 d . . . 
H2BA H 0.5571 0.3550 0.6125 0.082(16) Uiso 1 1 calc R . . 
H2BB H 0.5046 0.2396 0.5686 0.057(12) Uiso 1 1 calc R . . 
H2BC H 0.5670 0.2244 0.6576 0.066(13) Uiso 1 1 calc R . . 
C3B C 0.39207(18) 0.4428(3) 0.58431(18) 0.0301(6) Uani 1 1 d . . . 
H3BA H 0.4100 0.4589 0.5416 0.034(9) Uiso 1 1 calc R . . 
H3BB H 0.3412 0.4049 0.5597 0.046(11) Uiso 1 1 calc R . . 
C4B C 0.29934(17) 0.5788(3) 0.65155(19) 0.0302(6) Uani 1 1 d . . . 
H4BA H 0.3015 0.6478 0.6890 0.035(9) Uiso 1 1 calc R . . 
C5B C 0.30054(18) 0.4562(3) 0.6948(2) 0.0355(7) Uani 1 1 d . . . 
H5BA H 0.2659 0.4621 0.7217 0.048(11) Uiso 1 1 calc R . . 
H5BB H 0.3518 0.4402 0.7343 0.047(11) Uiso 1 1 calc R . . 
H5BC H 0.2846 0.3880 0.6561 0.037(9) Uiso 1 1 calc R . . 
C6B C 0.22469(19) 0.5913(4) 0.5793(2) 0.0449(9) Uani 1 1 d . . . 
H6BA H 0.1831 0.5678 0.5941 0.073(14) Uiso 1 1 calc R . . 
H6BB H 0.2249 0.5365 0.5367 0.054(12) Uiso 1 1 calc R . . 
H6BC H 0.2180 0.6777 0.5606 0.066(14) Uiso 1 1 calc R . . 
C7B C 0.37361(19) 0.7121(3) 0.55644(17) 0.0313(6) Uani 1 1 d . . . 
H7BA H 0.4240 0.7217 0.5538 0.033(9) Uiso 1 1 calc R . . 
C8B C 0.3177(2) 0.6880(3) 0.4707(2) 0.0435(9) Uani 1 1 d . . . 
H8BA H 0.3269 0.7473 0.4349 0.072(14) Uiso 1 1 calc R . . 
H8BB H 0.2660 0.6982 0.4669 0.050(12) Uiso 1 1 calc R . . 
H8BC H 0.3244 0.6030 0.4553 0.060(13) Uiso 1 1 calc R . . 
C9B C 0.3579(2) 0.8377(3) 0.5873(2) 0.0386(8) Uani 1 1 d . . . 
H9BA H 0.3653 0.9054 0.5554 0.070(14) Uiso 1 1 calc R . . 
H9BB H 0.3926 0.8484 0.6432 0.041(10) Uiso 1 1 calc R . . 
H9BC H 0.3057 0.8392 0.5829 0.037(10) Uiso 1 1 calc R . . 
C10B C 0.54313(16) 0.7364(2) 0.70091(15) 0.0237(5) Uani 1 1 d . . . 
C11B C 0.56232(18) 0.8480(3) 0.67556(17) 0.0284(6) Uani 1 1 d . . . 
H11B H 0.5493 0.9254 0.6918 0.023(8) Uiso 1 1 calc R . . 
C12B C 0.60141(19) 0.8440(3) 0.62535(17) 0.0319(7) Uani 1 1 d . . . 
C13B C 0.62119(19) 0.7304(3) 0.60441(18) 0.0348(7) Uani 1 1 d . . . 
H13B H 0.6489 0.7265 0.5719 0.039(10) Uiso 1 1 calc R . . 
C14B C 0.60013(19) 0.6212(3) 0.63144(18) 0.0317(6) Uani 1 1 d . . . 
H14B H 0.6129 0.5426 0.6167 0.025(8) Uiso 1 1 calc R . . 
C15B C 0.6208(2) 0.9636(3) 0.5937(2) 0.0457(9) Uani 1 1 d . . . 
H15D H 0.6663 0.9509 0.5836 0.12(2) Uiso 1 1 calc R . . 
H15E H 0.6298 1.0300 0.6332 0.093(17) Uiso 1 1 calc R . . 
H15F H 0.5787 0.9871 0.5440 0.19(3) Uiso 1 1 calc R . . 
 
loop_ 
 _atom_site_aniso_label 
 _atom_site_aniso_U_11 
 _atom_site_aniso_U_22 
 _atom_site_aniso_U_33 
 _atom_site_aniso_U_23 
 _atom_site_aniso_U_13 
 _atom_site_aniso_U_12 
Re1A 0.01990(7) 0.01253(6) 0.02126(7) 0.000 0.01091(6) 0.000 
P1A 0.0208(3) 0.0176(3) 0.0233(3) 0.0003(2) 0.0069(3) -0.0034(2) 
Si1A 0.0384(5) 0.0171(3) 0.0323(4) 0.0048(3) 0.0162(4) 0.0052(3) 
N1A 0.0270(17) 0.0150(12) 0.0254(15) 0.000 0.0144(14) 0.000 
N2A 0.0257(12) 0.0288(11) 0.0194(11) -0.0026(9) 0.0075(10) 0.0055(10) 
C1A 0.071(3) 0.0208(13) 0.0362(17) 0.0054(12) 0.0188(19) -0.0044(15) 
C2A 0.054(2) 0.0438(19) 0.057(2) 0.0140(17) 0.028(2) 0.0275(18) 
C3A 0.0306(17) 0.0246(13) 0.0459(19) 0.0049(13) 0.0081(15) 0.0027(12) 
C4A 0.0323(16) 0.0333(14) 0.0205(13) -0.0009(11) 0.0095(12) -0.0033(12) 
C5A 0.059(3) 0.0464(19) 0.0258(15) -0.0038(14) 0.0134(17) -0.0130(18) 
C6A 0.0371(18) 0.0423(17) 0.0262(14) 0.0007(13) 0.0135(14) -0.0123(14) 
C7A 0.028(3) 0.027(2) 0.022(3) 0.004(2) 0.005(2) -0.0092(18) 
C8A 0.044(5) 0.025(3) 0.028(4) -0.003(2) 0.007(3) -0.010(3) 
C9A 0.032(3) 0.040(2) 0.031(2) 0.0001(19) 0.000(2) -0.011(2) 
C7D 0.024(5) 0.029(5) 0.020(7) -0.005(5) 0.009(6) -0.011(4) 
C8D 0.049(10) 0.018(6) 0.043(15) -0.002(6) 0.025(8) -0.011(6) 
C9D 0.030(6) 0.057(7) 0.029(6) -0.007(5) 0.005(5) -0.012(5) 
C10A 0.0261(14) 0.0294(13) 0.0195(12) -0.0060(10) 0.0083(11) 0.0030(11) 
C11A 0.0335(16) 0.0257(13) 0.0273(14) -0.0052(11) 0.0110(13) 0.0067(12) 
C12A 0.0317(16) 0.0371(15) 0.0245(13) -0.0042(12) 0.0093(13) 0.0132(13) 
C13A 0.0286(16) 0.0447(17) 0.0326(15) -0.0019(13) 0.0146(14) 0.0046(14) 
C14A 0.0274(15) 0.0337(14) 0.0283(14) -0.0021(12) 0.0105(13) -0.0009(12) 
C15A 0.039(2) 0.0385(17) 0.049(2) -0.0065(15) 0.0156(18) 0.0121(16) 
Re1B 0.01597(7) 0.01230(6) 0.02088(7) 0.000 0.00703(5) 0.000 
P1B 0.0183(3) 0.0193(3) 0.0232(3) -0.0030(2) 0.0051(3) 0.0006(2) 
Si1B 0.0257(4) 0.0167(3) 0.0420(5) -0.0085(3) 0.0131(4) -0.0013(3) 
N1B 0.0194(15) 0.0148(12) 0.0295(16) 0.000 0.0090(14) 0.000 
N2B 0.0222(12) 0.0250(10) 0.0264(11) 0.0017(9) 0.0066(10) -0.0035(9) 
C1B 0.041(2) 0.0221(14) 0.074(3) -0.0120(15) 0.020(2) -0.0089(14) 
C2B 0.0364(19) 0.0399(17) 0.055(2) -0.0147(16) 0.0203(18) 0.0062(15) 
C3B 0.0273(15) 0.0260(13) 0.0320(15) -0.0103(11) 0.0068(13) -0.0013(12) 
C4B 0.0223(14) 0.0296(13) 0.0366(16) -0.0047(12) 0.0096(13) -0.0011(11) 
C5B 0.0250(15) 0.0325(14) 0.054(2) -0.0023(14) 0.0218(15) -0.0046(13) 
C6B 0.0212(16) 0.054(2) 0.052(2) -0.0099(17) 0.0059(15) -0.0005(15) 
C7B 0.0318(16) 0.0327(14) 0.0243(14) 0.0042(11) 0.0060(13) 0.0016(13) 
C8B 0.038(2) 0.055(2) 0.0286(16) 0.0019(15) 0.0039(15) 0.0086(16) 
C9B 0.043(2) 0.0260(13) 0.0360(17) 0.0085(13) 0.0043(15) 0.0097(14) 
C10B 0.0210(13) 0.0244(12) 0.0210(12) 0.0009(10) 0.0036(11) -0.0037(10) 
C11B 0.0303(16) 0.0229(12) 0.0280(14) 0.0026(11) 0.0075(12) -0.0041(11) 
C12B 0.0361(17) 0.0318(14) 0.0252(14) 0.0061(12) 0.0097(13) -0.0082(13) 
C13B 0.0389(18) 0.0378(16) 0.0314(15) 0.0004(13) 0.0179(14) -0.0071(14) 
C14B 0.0337(17) 0.0312(14) 0.0318(15) -0.0021(12) 0.0149(14) -0.0018(13) 
C15B 0.058(2) 0.0363(16) 0.047(2) 0.0125(16) 0.0251(19) -0.0070(17) 
 
_geom_special_details 
; 
 All esds (except the esd in the dihedral angle between two l.s. planes) 
 are estimated using the full covariance matrix.  The cell esds are taken 
 into account individually in the estimation of esds in distances, angles 
 and torsion angles; correlations between esds in cell parameters are only 
 used when they are defined by crystal symmetry.  An approximate (isotropic) 
 treatment of cell esds is used for estimating esds involving l.s. planes. 
; 
 
loop_ 
 _geom_bond_atom_site_label_1 
 _geom_bond_atom_site_label_2 
 _geom_bond_distance 
 _geom_bond_site_symmetry_2 
 _geom_bond_publ_flag 
Re1A C10A 2.020(3) 2 ? 
Re1A C10A 2.020(3) . ? 
Re1A N2A 2.133(3) 2 ? 
Re1A N2A 2.133(3) . ? 
Re1A N1A 2.147(3) . ? 
Re1A P1A 2.3908(7) 2 ? 
Re1A P1A 2.3908(7) . ? 
P1A C3A 1.827(3) . ? 
P1A C4A 1.855(3) . ? 
P1A C7A 1.859(6) . ? 
P1A C7D 1.895(14) . ? 
Si1A N1A 1.7087(16) . ? 
Si1A C2A 1.878(4) . ? 
Si1A C1A 1.887(3) . ? 
Si1A C3A 1.890(3) . ? 
N1A Si1A 1.7087(16) 2 ? 
N2A C14A 1.326(4) . ? 
N2A C10A 1.353(4) . ? 
C1A H1AB 0.9800 . ? 
C1A H1AC 0.9800 . ? 
C1A H1AD 0.9800 . ? 
C2A H2AA 0.9800 . ? 
C2A H2AB 0.9800 . ? 
C2A H2AC 0.9800 . ? 
C3A H3AA 0.9900 . ? 
C3A H3AB 0.9900 . ? 
C4A C6A 1.532(4) . ? 
C4A C5A 1.537(4) . ? 
C4A H4AA 1.0000 . ? 
C5A H5AA 0.9800 . ? 
C5A H5AB 0.9800 . ? 
C5A H5AC 0.9800 . ? 
C6A H6AA 0.9800 . ? 
C6A H6AB 0.9800 . ? 
C6A H6AC 0.9800 . ? 
C7A C9A 1.531(6) . ? 
C7A C8A 1.538(8) . ? 
C7A H7AA 1.0000 . ? 
C8A H8AA 0.9800 . ? 
C8A H8AB 0.9800 . ? 
C8A H8AC 0.9800 . ? 
C9A H9AA 0.9800 . ? 
C9A H9AB 0.9800 . ? 
C9A H9AC 0.9800 . ? 
C7D C9D 1.529(12) . ? 
C7D C8D 1.540(13) . ? 
C7D H7DA 1.0000 . ? 
C8D H8DA 0.9800 . ? 
C8D H8DB 0.9800 . ? 
C8D H8DC 0.9800 . ? 
C9D H9DA 0.9800 . ? 
C9D H9DB 0.9800 . ? 
C9D H9DC 0.9800 . ? 
C10A C11A 1.388(4) . ? 
C11A C12A 1.412(4) . ? 
C11A H11A 0.9500 . ? 
C12A C13A 1.383(5) . ? 
C12A C15A 1.518(4) . ? 
C13A C14A 1.401(4) . ? 
C13A H13A 0.9500 . ? 
C14A H14A 0.9500 . ? 
C15A H15A 0.9800 . ? 
C15A H15B 0.9800 . ? 
C15A H15C 0.9800 . ? 
Re1B C10B 2.018(3) 2_656 ? 
Re1B C10B 2.018(3) . ? 
Re1B N2B 2.138(2) 2_656 ? 
Re1B N2B 2.138(2) . ? 
Re1B N1B 2.155(3) . ? 
Re1B P1B 2.3855(7) 2_656 ? 
Re1B P1B 2.3855(7) . ? 
P1B C3B 1.829(3) . ? 
P1B C7B 1.858(3) . ? 
P1B C4B 1.862(3) . ? 
Si1B N1B 1.7083(15) . ? 
Si1B C2B 1.886(3) . ? 
Si1B C1B 1.889(3) . ? 
Si1B C3B 1.899(3) . ? 
N1B Si1B 1.7083(15) 2_656 ? 
N2B C14B 1.320(4) . ? 
N2B C10B 1.352(4) . ? 
C1B H1BB 0.9800 . ? 
C1B H1BC 0.9800 . ? 
C1B H1BD 0.9800 . ? 
C2B H2BA 0.9800 . ? 
C2B H2BB 0.9800 . ? 
C2B H2BC 0.9800 . ? 
C3B H3BA 0.9900 . ? 
C3B H3BB 0.9900 . ? 
C4B C6B 1.523(4) . ? 
C4B C5B 1.533(4) . ? 
C4B H4BA 1.0000 . ? 
C5B H5BA 0.9800 . ? 
C5B H5BB 0.9800 . ? 
C5B H5BC 0.9800 . ? 
C6B H6BA 0.9800 . ? 
C6B H6BB 0.9800 . ? 
C6B H6BC 0.9800 . ? 
C7B C8B 1.530(4) . ? 
C7B C9B 1.541(4) . ? 
C7B H7BA 1.0000 . ? 
C8B H8BA 0.9800 . ? 
C8B H8BB 0.9800 . ? 
C8B H8BC 0.9800 . ? 
C9B H9BA 0.9800 . ? 
C9B H9BB 0.9800 . ? 
C9B H9BC 0.9800 . ? 
C10B C11B 1.390(4) . ? 
C11B C12B 1.407(4) . ? 
C11B H11B 0.9500 . ? 
C12B C13B 1.379(4) . ? 
C12B C15B 1.518(4) . ? 
C13B C14B 1.397(4) . ? 
C13B H13B 0.9500 . ? 
C14B H14B 0.9500 . ? 
C15B H15D 0.9800 . ? 
C15B H15E 0.9800 . ? 
C15B H15F 0.9800 . ? 
 
loop_ 
 _geom_angle_atom_site_label_1 
 _geom_angle_atom_site_label_2 
 _geom_angle_atom_site_label_3 
 _geom_angle 
 _geom_angle_site_symmetry_1 
 _geom_angle_site_symmetry_3 
 _geom_angle_publ_flag 
C10A Re1A C10A 92.59(17) 2 . ? 
C10A Re1A N2A 37.91(10) 2 2 ? 
C10A Re1A N2A 130.50(11) . 2 ? 
C10A Re1A N2A 130.50(11) 2 . ? 
C10A Re1A N2A 37.91(10) . . ? 
N2A Re1A N2A 168.40(13) 2 . ? 
C10A Re1A N1A 133.70(8) 2 . ? 
C10A Re1A N1A 133.70(8) . . ? 
N2A Re1A N1A 95.80(6) 2 . ? 
N2A Re1A N1A 95.80(6) . . ? 
C10A Re1A P1A 93.98(8) 2 2 ? 
C10A Re1A P1A 91.98(8) . 2 ? 
N2A Re1A P1A 92.04(6) 2 2 ? 
N2A Re1A P1A 88.83(6) . 2 ? 
N1A Re1A P1A 85.684(15) . 2 ? 
C10A Re1A P1A 91.98(8) 2 . ? 
C10A Re1A P1A 93.98(8) . . ? 
N2A Re1A P1A 88.83(6) 2 . ? 
N2A Re1A P1A 92.04(6) . . ? 
N1A Re1A P1A 85.684(15) . . ? 
P1A Re1A P1A 171.37(3) 2 . ? 
C3A P1A C4A 105.56(16) . . ? 
C3A P1A C7A 104.6(2) . . ? 
C4A P1A C7A 110.6(2) . . ? 
C3A P1A C7D 105.2(4) . . ? 
C4A P1A C7D 94.6(4) . . ? 
C7A P1A C7D 16.9(3) . . ? 
C3A P1A Re1A 106.86(11) . . ? 
C4A P1A Re1A 114.76(10) . . ? 
C7A P1A Re1A 113.49(17) . . ? 
C7D P1A Re1A 127.7(4) . . ? 
N1A Si1A C2A 112.67(12) . . ? 
N1A Si1A C1A 114.82(15) . . ? 
C2A Si1A C1A 105.17(18) . . ? 
N1A Si1A C3A 108.82(13) . . ? 
C2A Si1A C3A 106.55(18) . . ? 
C1A Si1A C3A 108.42(15) . . ? 
Si1A N1A Si1A 122.87(17) 2 . ? 
Si1A N1A Re1A 118.57(9) 2 . ? 
Si1A N1A Re1A 118.57(9) . . ? 
C14A N2A C10A 123.0(3) . . ? 
C14A N2A Re1A 170.1(2) . . ? 
C10A N2A Re1A 66.52(16) . . ? 
Si1A C1A H1AB 109.5 . . ? 
Si1A C1A H1AC 109.5 . . ? 
H1AB C1A H1AC 109.5 . . ? 
Si1A C1A H1AD 109.5 . . ? 
H1AB C1A H1AD 109.5 . . ? 
H1AC C1A H1AD 109.5 . . ? 
Si1A C2A H2AA 109.5 . . ? 
Si1A C2A H2AB 109.5 . . ? 
H2AA C2A H2AB 109.5 . . ? 
Si1A C2A H2AC 109.5 . . ? 
H2AA C2A H2AC 109.5 . . ? 
H2AB C2A H2AC 109.5 . . ? 
P1A C3A Si1A 110.69(17) . . ? 
P1A C3A H3AA 109.5 . . ? 
Si1A C3A H3AA 109.5 . . ? 
P1A C3A H3AB 109.5 . . ? 
Si1A C3A H3AB 109.5 . . ? 
H3AA C3A H3AB 108.1 . . ? 
C6A C4A C5A 109.3(3) . . ? 
C6A C4A P1A 109.5(2) . . ? 
C5A C4A P1A 115.9(2) . . ? 
C6A C4A H4AA 107.3 . . ? 
C5A C4A H4AA 107.3 . . ? 
P1A C4A H4AA 107.3 . . ? 
C4A C5A H5AA 109.5 . . ? 
C4A C5A H5AB 109.5 . . ? 
H5AA C5A H5AB 109.5 . . ? 
C4A C5A H5AC 109.5 . . ? 
H5AA C5A H5AC 109.5 . . ? 
H5AB C5A H5AC 109.5 . . ? 
C4A C6A H6AA 109.5 . . ? 
C4A C6A H6AB 109.5 . . ? 
H6AA C6A H6AB 109.5 . . ? 
C4A C6A H6AC 109.5 . . ? 
H6AA C6A H6AC 109.5 . . ? 
H6AB C6A H6AC 109.5 . . ? 
C9A C7A C8A 111.7(6) . . ? 
C9A C7A P1A 116.3(4) . . ? 
C8A C7A P1A 110.9(6) . . ? 
C9A C7A H7AA 105.6 . . ? 
C8A C7A H7AA 105.7 . . ? 
P1A C7A H7AA 105.6 . . ? 
C9D C7D C8D 112.7(12) . . ? 
C9D C7D P1A 109.6(8) . . ? 
C8D C7D P1A 108.3(16) . . ? 
C9D C7D H7DA 108.7 . . ? 
C8D C7D H7DA 108.7 . . ? 
P1A C7D H7DA 108.7 . . ? 
C7D C8D H8DA 109.5 . . ? 
C7D C8D H8DB 109.5 . . ? 
H8DA C8D H8DB 109.5 . . ? 
C7D C8D H8DC 109.5 . . ? 
H8DA C8D H8DC 109.5 . . ? 
H8DB C8D H8DC 109.5 . . ? 
C7D C9D H9DA 109.5 . . ? 
C7D C9D H9DB 109.5 . . ? 
H9DA C9D H9DB 109.5 . . ? 
C7D C9D H9DC 109.5 . . ? 
H9DA C9D H9DC 109.5 . . ? 
H9DB C9D H9DC 109.5 . . ? 
N2A C10A C11A 119.7(3) . . ? 
N2A C10A Re1A 75.58(16) . . ? 
C11A C10A Re1A 164.3(2) . . ? 
C10A C11A C12A 118.5(3) . . ? 
C10A C11A H11A 120.7 . . ? 
C12A C11A H11A 120.7 . . ? 
C13A C12A C11A 119.8(3) . . ? 
C13A C12A C15A 119.8(3) . . ? 
C11A C12A C15A 120.4(3) . . ? 
C12A C13A C14A 119.1(3) . . ? 
C12A C13A H13A 120.5 . . ? 
C14A C13A H13A 120.5 . . ? 
N2A C14A C13A 119.8(3) . . ? 
N2A C14A H14A 120.1 . . ? 
C13A C14A H14A 120.1 . . ? 
C12A C15A H15A 109.5 . . ? 
C12A C15A H15B 109.5 . . ? 
H15A C15A H15B 109.5 . . ? 
C12A C15A H15C 109.5 . . ? 
H15A C15A H15C 109.5 . . ? 
H15B C15A H15C 109.5 . . ? 
C10B Re1B C10B 92.06(16) 2_656 . ? 
C10B Re1B N2B 37.84(10) 2_656 2_656 ? 
C10B Re1B N2B 129.90(10) . 2_656 ? 
C10B Re1B N2B 129.90(10) 2_656 . ? 
C10B Re1B N2B 37.84(10) . . ? 
N2B Re1B N2B 167.74(12) 2_656 . ? 
C10B Re1B N1B 133.97(8) 2_656 . ? 
C10B Re1B N1B 133.97(8) . . ? 
N2B Re1B N1B 96.13(6) 2_656 . ? 
N2B Re1B N1B 96.13(6) . . ? 
C10B Re1B P1B 92.48(8) 2_656 2_656 ? 
C10B Re1B P1B 93.46(8) . 2_656 ? 
N2B Re1B P1B 89.42(7) 2_656 2_656 ? 
N2B Re1B P1B 91.50(7) . 2_656 ? 
N1B Re1B P1B 85.716(16) . 2_656 ? 
C10B Re1B P1B 93.46(8) 2_656 . ? 
C10B Re1B P1B 92.48(8) . . ? 
N2B Re1B P1B 91.50(7) 2_656 . ? 
N2B Re1B P1B 89.42(7) . . ? 
N1B Re1B P1B 85.716(16) . . ? 
P1B Re1B P1B 171.43(3) 2_656 . ? 
C3B P1B C7B 105.56(14) . . ? 
C3B P1B C4B 105.67(14) . . ? 
C7B P1B C4B 108.97(15) . . ? 
C3B P1B Re1B 106.83(10) . . ? 
C7B P1B Re1B 114.98(11) . . ? 
C4B P1B Re1B 114.03(10) . . ? 
N1B Si1B C2B 112.52(12) . . ? 
N1B Si1B C1B 114.39(16) . . ? 
C2B Si1B C1B 105.01(17) . . ? 
N1B Si1B C3B 109.05(12) . . ? 
C2B Si1B C3B 106.50(16) . . ? 
C1B Si1B C3B 109.01(16) . . ? 
Si1B N1B Si1B 124.38(17) . 2_656 ? 
Si1B N1B Re1B 117.81(9) . . ? 
Si1B N1B Re1B 117.81(9) 2_656 . ? 
C14B N2B C10B 122.7(2) . . ? 
C14B N2B Re1B 171.0(2) . . ? 
C10B N2B Re1B 66.28(15) . . ? 
Si1B C1B H1BB 109.5 . . ? 
Si1B C1B H1BC 109.5 . . ? 
H1BB C1B H1BC 109.5 . . ? 
Si1B C1B H1BD 109.5 . . ? 
H1BB C1B H1BD 109.5 . . ? 
H1BC C1B H1BD 109.5 . . ? 
Si1B C2B H2BA 109.5 . . ? 
Si1B C2B H2BB 109.5 . . ? 
H2BA C2B H2BB 109.5 . . ? 
Si1B C2B H2BC 109.5 . . ? 
H2BA C2B H2BC 109.5 . . ? 
H2BB C2B H2BC 109.5 . . ? 
P1B C3B Si1B 110.22(15) . . ? 
P1B C3B H3BA 109.6 . . ? 
Si1B C3B H3BA 109.6 . . ? 
P1B C3B H3BB 109.6 . . ? 
Si1B C3B H3BB 109.6 . . ? 
H3BA C3B H3BB 108.1 . . ? 
C6B C4B C5B 109.7(3) . . ? 
C6B C4B P1B 116.4(2) . . ? 
C5B C4B P1B 108.9(2) . . ? 
C6B C4B H4BA 107.1 . . ? 
C5B C4B H4BA 107.1 . . ? 
P1B C4B H4BA 107.1 . . ? 
C4B C5B H5BA 109.5 . . ? 
C4B C5B H5BB 109.5 . . ? 
H5BA C5B H5BB 109.5 . . ? 
C4B C5B H5BC 109.5 . . ? 
H5BA C5B H5BC 109.5 . . ? 
H5BB C5B H5BC 109.5 . . ? 
C4B C6B H6BA 109.5 . . ? 
C4B C6B H6BB 109.5 . . ? 
H6BA C6B H6BB 109.5 . . ? 
C4B C6B H6BC 109.5 . . ? 
H6BA C6B H6BC 109.5 . . ? 
H6BB C6B H6BC 109.5 . . ? 
C8B C7B C9B 111.3(3) . . ? 
C8B C7B P1B 118.4(2) . . ? 
C9B C7B P1B 109.5(2) . . ? 
C8B C7B H7BA 105.5 . . ? 
C9B C7B H7BA 105.5 . . ? 
P1B C7B H7BA 105.5 . . ? 
C7B C8B H8BA 109.5 . . ? 
C7B C8B H8BB 109.5 . . ? 
H8BA C8B H8BB 109.5 . . ? 
C7B C8B H8BC 109.5 . . ? 
H8BA C8B H8BC 109.5 . . ? 
H8BB C8B H8BC 109.5 . . ? 
C7B C9B H9BA 109.5 . . ? 
C7B C9B H9BB 109.5 . . ? 
H9BA C9B H9BB 109.5 . . ? 
C7B C9B H9BC 109.5 . . ? 
H9BA C9B H9BC 109.5 . . ? 
H9BB C9B H9BC 109.5 . . ? 
N2B C10B C11B 119.8(3) . . ? 
N2B C10B Re1B 75.88(16) . . ? 
C11B C10B Re1B 164.2(2) . . ? 
C10B C11B C12B 118.5(3) . . ? 
C10B C11B H11B 120.7 . . ? 
C12B C11B H11B 120.7 . . ? 
C13B C12B C11B 119.5(3) . . ? 
C13B C12B C15B 120.3(3) . . ? 
C11B C12B C15B 120.2(3) . . ? 
C12B C13B C14B 119.5(3) . . ? 
C12B C13B H13B 120.3 . . ? 
C14B C13B H13B 120.3 . . ? 
N2B C14B C13B 120.0(3) . . ? 
N2B C14B H14B 120.0 . . ? 
C13B C14B H14B 120.0 . . ? 
C12B C15B H15D 109.5 . . ? 
C12B C15B H15E 109.5 . . ? 
H15D C15B H15E 109.5 . . ? 
C12B C15B H15F 109.5 . . ? 
H15D C15B H15F 109.5 . . ? 
H15E C15B H15F 109.5 . . ? 
 
loop_ 
 _geom_torsion_atom_site_label_1 
 _geom_torsion_atom_site_label_2 
 _geom_torsion_atom_site_label_3 
 _geom_torsion_atom_site_label_4 
 _geom_torsion 
 _geom_torsion_site_symmetry_1 
 _geom_torsion_site_symmetry_2 
 _geom_torsion_site_symmetry_3 
 _geom_torsion_site_symmetry_4 
 _geom_torsion_publ_flag 
C10A Re1A P1A C3A 106.79(15) 2 . . . ? 
C10A Re1A P1A C3A -160.47(15) . . . . ? 
N2A Re1A P1A C3A 69.01(14) 2 . . . ? 
N2A Re1A P1A C3A -122.56(14) . . . . ? 
N1A Re1A P1A C3A -26.89(12) . . . . ? 
P1A Re1A P1A C3A -26.89(12) 2 . . . ? 
C10A Re1A P1A C4A -136.57(13) 2 . . . ? 
C10A Re1A P1A C4A -43.84(13) . . . . ? 
N2A Re1A P1A C4A -174.35(12) 2 . . . ? 
N2A Re1A P1A C4A -5.92(12) . . . . ? 
N1A Re1A P1A C4A 89.74(10) . . . . ? 
P1A Re1A P1A C4A 89.74(10) 2 . . . ? 
C10A Re1A P1A C7A -8.0(2) 2 . . . ? 
C10A Re1A P1A C7A 84.7(2) . . . . ? 
N2A Re1A P1A C7A -45.8(2) 2 . . . ? 
N2A Re1A P1A C7A 122.7(2) . . . . ? 
N1A Re1A P1A C7A -141.7(2) . . . . ? 
P1A Re1A P1A C7A -141.7(2) 2 . . . ? 
C10A Re1A P1A C7D -18.7(5) 2 . . . ? 
C10A Re1A P1A C7D 74.1(5) . . . . ? 
N2A Re1A P1A C7D -56.4(5) 2 . . . ? 
N2A Re1A P1A C7D 112.0(5) . . . . ? 
N1A Re1A P1A C7D -152.3(5) . . . . ? 
P1A Re1A P1A C7D -152.3(5) 2 . . . ? 
C2A Si1A N1A Si1A -81.64(15) . . . 2 ? 
C1A Si1A N1A Si1A 38.73(13) . . . 2 ? 
C3A Si1A N1A Si1A 160.43(13) . . . 2 ? 
C2A Si1A N1A Re1A 98.36(15) . . . . ? 
C1A Si1A N1A Re1A -141.27(13) . . . . ? 
C3A Si1A N1A Re1A -19.57(13) . . . . ? 
C10A Re1A N1A Si1A 119.09(11) 2 . . 2 ? 
C10A Re1A N1A Si1A -60.91(11) . . . 2 ? 
N2A Re1A N1A Si1A 119.33(7) 2 . . 2 ? 
N2A Re1A N1A Si1A -60.67(7) . . . 2 ? 
P1A Re1A N1A Si1A 27.71(4) 2 . . 2 ? 
P1A Re1A N1A Si1A -152.29(4) . . . 2 ? 
C10A Re1A N1A Si1A -60.91(11) 2 . . . ? 
C10A Re1A N1A Si1A 119.09(11) . . . . ? 
N2A Re1A N1A Si1A -60.67(7) 2 . . . ? 
N2A Re1A N1A Si1A 119.33(7) . . . . ? 
P1A Re1A N1A Si1A -152.29(4) 2 . . . ? 
P1A Re1A N1A Si1A 27.71(4) . . . . ? 
C10A Re1A N2A C14A -165.0(12) 2 . . . ? 
C10A Re1A N2A C14A -165.5(13) . . . . ? 
N2A Re1A N2A C14A -165.2(12) 2 . . . ? 
N1A Re1A N2A C14A 14.8(12) . . . . ? 
P1A Re1A N2A C14A -70.7(12) 2 . . . ? 
P1A Re1A N2A C14A 100.7(12) . . . . ? 
C10A Re1A N2A C10A 0.5(3) 2 . . . ? 
N2A Re1A N2A C10A 0.28(14) 2 . . . ? 
N1A Re1A N2A C10A -179.72(14) . . . . ? 
P1A Re1A N2A C10A 94.74(14) 2 . . . ? 
P1A Re1A N2A C10A -93.85(14) . . . . ? 
C4A P1A C3A Si1A -100.35(19) . . . . ? 
C7A P1A C3A Si1A 142.9(2) . . . . ? 
C7D P1A C3A Si1A 160.3(4) . . . . ? 
Re1A P1A C3A Si1A 22.2(2) . . . . ? 
N1A Si1A C3A P1A -4.3(2) . . . . ? 
C2A Si1A C3A P1A -126.02(19) . . . . ? 
C1A Si1A C3A P1A 121.2(2) . . . . ? 
C3A P1A C4A C6A 52.5(2) . . . . ? 
C7A P1A C4A C6A 165.1(3) . . . . ? 
C7D P1A C4A C6A 159.7(5) . . . . ? 
Re1A P1A C4A C6A -64.9(2) . . . . ? 
C3A P1A C4A C5A -71.7(3) . . . . ? 
C7A P1A C4A C5A 40.9(3) . . . . ? 
C7D P1A C4A C5A 35.5(5) . . . . ? 
Re1A P1A C4A C5A 170.9(2) . . . . ? 
C3A P1A C7A C9A 40.8(5) . . . . ? 
C4A P1A C7A C9A -72.5(5) . . . . ? 
C7D P1A C7A C9A -53.4(17) . . . . ? 
Re1A P1A C7A C9A 156.9(4) . . . . ? 
C3A P1A C7A C8A 169.9(5) . . . . ? 
C4A P1A C7A C8A 56.7(6) . . . . ? 
C7D P1A C7A C8A 76(2) . . . . ? 
Re1A P1A C7A C8A -73.9(6) . . . . ? 
C3A P1A C7D C9D -59.1(10) . . . . ? 
C4A P1A C7D C9D -166.6(9) . . . . ? 
C7A P1A C7D C9D 31.2(14) . . . . ? 
Re1A P1A C7D C9D 67.0(10) . . . . ? 
C3A P1A C7D C8D 177.6(11) . . . . ? 
C4A P1A C7D C8D 70.1(11) . . . . ? 
C7A P1A C7D C8D -92(2) . . . . ? 
Re1A P1A C7D C8D -56.3(12) . . . . ? 
C14A N2A C10A C11A 0.8(4) . . . . ? 
Re1A N2A C10A C11A -176.2(3) . . . . ? 
C14A N2A C10A Re1A 177.1(3) . . . . ? 
C10A Re1A C10A N2A -179.61(19) 2 . . . ? 
N2A Re1A C10A N2A -179.93(4) 2 . . . ? 
N1A Re1A C10A N2A 0.39(19) . . . . ? 
P1A Re1A C10A N2A -85.54(14) 2 . . . ? 
P1A Re1A C10A N2A 88.22(14) . . . . ? 
C10A Re1A C10A C11A -11.8(8) 2 . . . ? 
N2A Re1A C10A C11A -12.1(9) 2 . . . ? 
N2A Re1A C10A C11A 167.8(9) . . . . ? 
N1A Re1A C10A C11A 168.2(8) . . . . ? 
P1A Re1A C10A C11A 82.3(8) 2 . . . ? 
P1A Re1A C10A C11A -104.0(8) . . . . ? 
N2A C10A C11A C12A 0.6(4) . . . . ? 
Re1A C10A C11A C12A -165.8(7) . . . . ? 
C10A C11A C12A C13A -1.8(4) . . . . ? 
C10A C11A C12A C15A 176.2(3) . . . . ? 
C11A C12A C13A C14A 1.7(4) . . . . ? 
C15A C12A C13A C14A -176.3(3) . . . . ? 
C10A N2A C14A C13A -0.9(4) . . . . ? 
Re1A N2A C14A C13A 163.1(10) . . . . ? 
C12A C13A C14A N2A -0.4(4) . . . . ? 
C10B Re1B P1B C3B -162.17(14) 2_656 . . . ? 
C10B Re1B P1B C3B 105.61(14) . . . . ? 
N2B Re1B P1B C3B -124.35(13) 2_656 . . . ? 
N2B Re1B P1B C3B 67.89(13) . . . . ? 
N1B Re1B P1B C3B -28.31(11) . . . . ? 
P1B Re1B P1B C3B -28.31(11) 2_656 . . . ? 
C10B Re1B P1B C7B 81.08(14) 2_656 . . . ? 
C10B Re1B P1B C7B -11.14(14) . . . . ? 
N2B Re1B P1B C7B 118.91(13) 2_656 . . . ? 
N2B Re1B P1B C7B -48.86(13) . . . . ? 
N1B Re1B P1B C7B -145.05(12) . . . . ? 
P1B Re1B P1B C7B -145.05(12) 2_656 . . . ? 
C10B Re1B P1B C4B -45.82(13) 2_656 . . . ? 
C10B Re1B P1B C4B -138.04(13) . . . . ? 
N2B Re1B P1B C4B -8.00(12) 2_656 . . . ? 
N2B Re1B P1B C4B -175.76(12) . . . . ? 
N1B Re1B P1B C4B 88.04(10) . . . . ? 
P1B Re1B P1B C4B 88.04(10) 2_656 . . . ? 
C2B Si1B N1B Si1B -82.62(14) . . . 2_656 ? 
C1B Si1B N1B Si1B 37.11(13) . . . 2_656 ? 
C3B Si1B N1B Si1B 159.45(12) . . . 2_656 ? 
C2B Si1B N1B Re1B 97.38(14) . . . . ? 
C1B Si1B N1B Re1B -142.89(13) . . . . ? 
C3B Si1B N1B Re1B -20.55(12) . . . . ? 
C10B Re1B N1B Si1B 119.74(11) 2_656 . . . ? 
C10B Re1B N1B Si1B -60.26(11) . . . . ? 
N2B Re1B N1B Si1B 120.11(7) 2_656 . . . ? 
N2B Re1B N1B Si1B -59.89(7) . . . . ? 
P1B Re1B N1B Si1B -150.94(4) 2_656 . . . ? 
P1B Re1B N1B Si1B 29.06(4) . . . . ? 
C10B Re1B N1B Si1B -60.26(11) 2_656 . . 2_656 ? 
C10B Re1B N1B Si1B 119.74(11) . . . 2_656 ? 
N2B Re1B N1B Si1B -59.89(7) 2_656 . . 2_656 ? 
N2B Re1B N1B Si1B 120.11(7) . . . 2_656 ? 
P1B Re1B N1B Si1B 29.06(4) 2_656 . . 2_656 ? 
P1B Re1B N1B Si1B -150.94(4) . . . 2_656 ? 
C10B Re1B N2B C14B -173.5(13) 2_656 . . . ? 
C10B Re1B N2B C14B -174.2(14) . . . . ? 
N2B Re1B N2B C14B -173.8(14) 2_656 . . . ? 
N1B Re1B N2B C14B 6.2(14) . . . . ? 
P1B Re1B N2B C14B 92.0(14) 2_656 . . . ? 
P1B Re1B N2B C14B -79.4(14) . . . . ? 
C10B Re1B N2B C10B 0.8(3) 2_656 . . . ? 
N2B Re1B N2B C10B 0.43(14) 2_656 . . . ? 
N1B Re1B N2B C10B -179.57(14) . . . . ? 
P1B Re1B N2B C10B -93.72(15) 2_656 . . . ? 
P1B Re1B N2B C10B 94.80(15) . . . . ? 
C7B P1B C3B Si1B 146.07(17) . . . . ? 
C4B P1B C3B Si1B -98.55(18) . . . . ? 
Re1B P1B C3B Si1B 23.24(18) . . . . ? 
N1B Si1B C3B P1B -4.25(19) . . . . ? 
C2B Si1B C3B P1B -125.91(18) . . . . ? 
C1B Si1B C3B P1B 121.27(19) . . . . ? 
C3B P1B C4B C6B -73.5(3) . . . . ? 
C7B P1B C4B C6B 39.5(3) . . . . ? 
Re1B P1B C4B C6B 169.4(2) . . . . ? 
C3B P1B C4B C5B 51.1(2) . . . . ? 
C7B P1B C4B C5B 164.2(2) . . . . ? 
Re1B P1B C4B C5B -65.9(2) . . . . ? 
C3B P1B C7B C8B 43.5(3) . . . . ? 
C4B P1B C7B C8B -69.6(3) . . . . ? 
Re1B P1B C7B C8B 161.0(2) . . . . ? 
C3B P1B C7B C9B 172.6(2) . . . . ? 
C4B P1B C7B C9B 59.5(3) . . . . ? 
Re1B P1B C7B C9B -69.9(3) . . . . ? 
C14B N2B C10B C11B 0.7(4) . . . . ? 
Re1B N2B C10B C11B -178.2(3) . . . . ? 
C14B N2B C10B Re1B 178.9(3) . . . . ? 
C10B Re1B C10B N2B -179.41(19) 2_656 . . . ? 
N2B Re1B C10B N2B -179.88(4) 2_656 . . . ? 
N1B Re1B C10B N2B 0.59(19) . . . . ? 
P1B Re1B C10B N2B 87.98(14) 2_656 . . . ? 
P1B Re1B C10B N2B -85.85(14) . . . . ? 
C10B Re1B C10B C11B -5.1(7) 2_656 . . . ? 
N2B Re1B C10B C11B -5.6(8) 2_656 . . . ? 
N2B Re1B C10B C11B 174.3(9) . . . . ? 
N1B Re1B C10B C11B 174.9(7) . . . . ? 
P1B Re1B C10B C11B -97.8(8) 2_656 . . . ? 
P1B Re1B C10B C11B 88.4(8) . . . . ? 
N2B C10B C11B C12B 0.3(4) . . . . ? 
Re1B C10B C11B C12B -173.3(6) . . . . ? 
C10B C11B C12B C13B -1.6(5) . . . . ? 
C10B C11B C12B C15B 177.6(3) . . . . ? 
C11B C12B C13B C14B 1.9(5) . . . . ? 
C15B C12B C13B C14B -177.4(3) . . . . ? 
C10B N2B C14B C13B -0.5(5) . . . . ? 
Re1B N2B C14B C13B 173.3(12) . . . . ? 
C12B C13B C14B N2B -0.9(5) . . . . ? 
 
_diffrn_measured_fraction_theta_max    0.971 
_diffrn_reflns_theta_full              30.02 
_diffrn_measured_fraction_theta_full   0.971 
_refine_diff_density_max    1.526 
_refine_diff_density_min   -0.705 
_refine_diff_density_rms    0.104 
